# Supplementary material for: Spiropyran-modified upconversion nanocomposite as a fluorescent sensor for diagnosis of histidinemia
Source: Royal Society of Chemistry journal article supplement (doi:10.1039/d0ra03711g), 2020-01-01
Supplement: d0ra03711g1.pdf [file d0ra03711g1.pdf]

# Electronic Supplementary Information

## **Spiropyran-modified upconversion nanocomposite as a fluorescent sensor for diagnosis of histidinemia**

Jian su<sup>a,b</sup>, Yiwei Li<sup>ab</sup>, Wen Gu<sup>\*a,b</sup> and Xin Liu<sup>\*a,b</sup>

a. College of Chemistry, Nankai University, Tianjin 300071, China.

b. Collaborative Innovation Center of Chemical Science and Engineering, Key Laboratory of Advanced Energy Materials Chemistry (MOE), College of Chemistry, Nankai University, Tianjin 300071, China

\*Corresponding authors

E-mail: guwen68@nankai.edu.cn, liuxin64@nankai.edu.cn

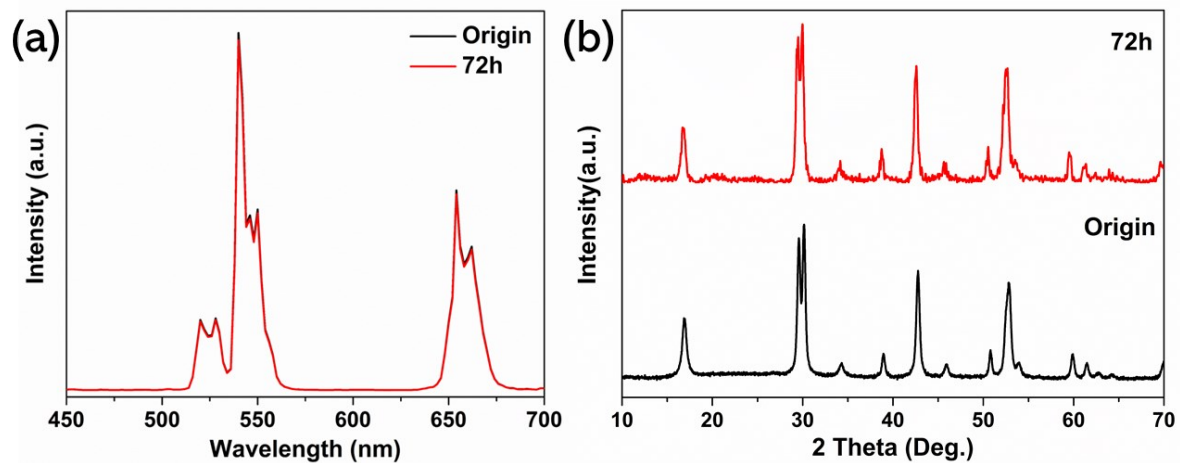

**Fig. S1** (a) Fluorescent spectra (under 980 nm laser excitation) and (b) XRD patterns of sensor before and after storage in detection solution (Tris-HCl buffer, pH = 7.4, 10 mM) for 72 h.

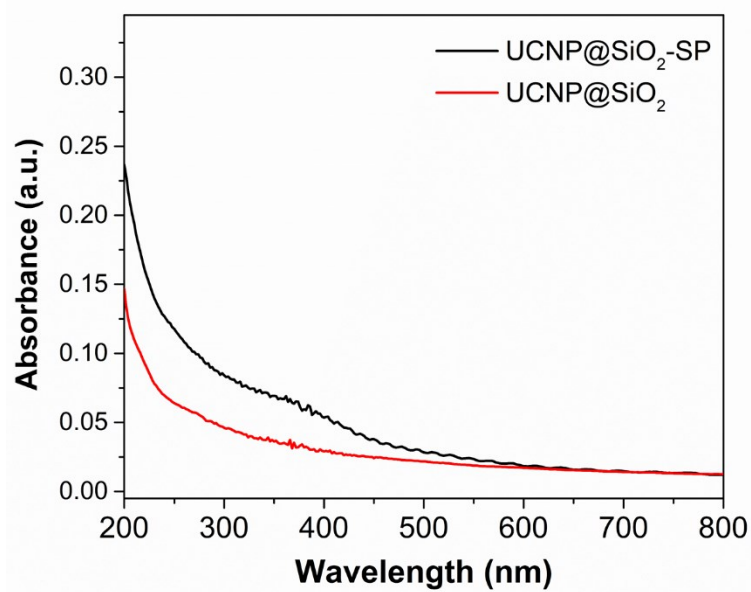

**Fig. S2** UV-vis absorption spectroscopy of UCNP@SiO<sub>2</sub> and UCNP@SiO<sub>2</sub>-SP.

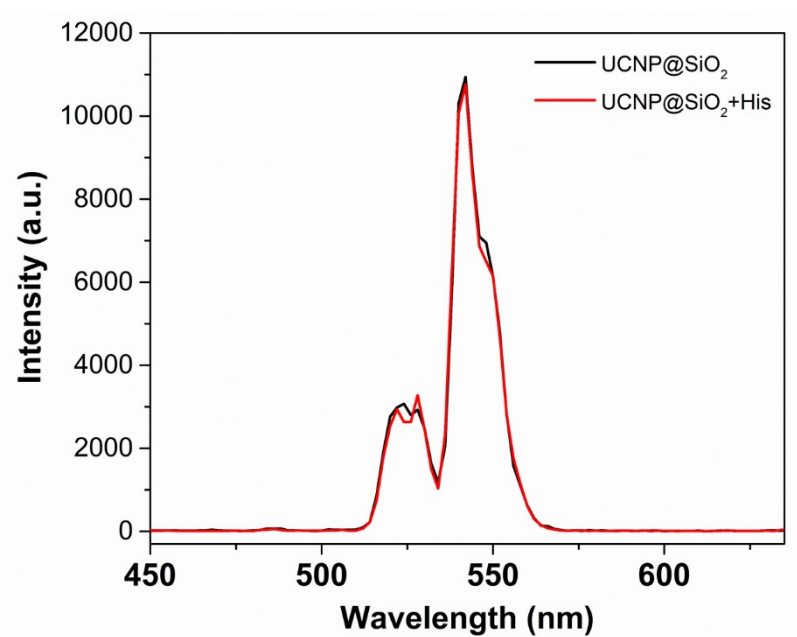

**Fig. S3** Upconversion fluorescence spectra of UCNP@SiO<sub>2</sub> and UCNP@SiO<sub>2</sub> with His.

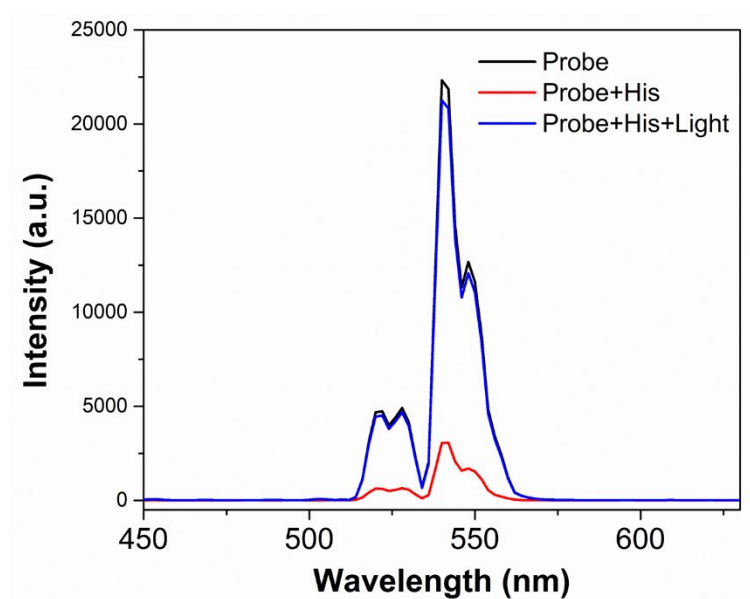

**Fig. S4** Upconversion fluorescence spectra of probe, probe + His and probe + His with white light irradiation.
